# Supplementary material for: Pressure Ulcer Diagnosis Is Associated with Increased Mortality in Patients with End-Stage Renal Disease: A Retrospective Study
Source: MDPI journal article supplement (doi:10.3390/life13081713), 2023-08-09
Supplement: s1 [file s1]

| <b>Supplementary Table S1. ICD-9-CM and ICD-10-CM codes used for the diagnosis of Pressure Ulcer</b> |                 |                  |
|------------------------------------------------------------------------------------------------------|-----------------|------------------|
| <b>AAA Diagnosis</b>                                                                                 | <b>ICD-9-CM</b> | <b>ICD-10-CM</b> |
| Pressure Ulcer                                                                                       | 707             | L89              |

| <b>Supplementary Table S2. ICD-9-CM and ICD-10-CM diagnosis codes for controlled comorbidities included in the Charlson Comorbidity Index</b> |                                                                 |                                                                                                                                                         |
|-----------------------------------------------------------------------------------------------------------------------------------------------|-----------------------------------------------------------------|---------------------------------------------------------------------------------------------------------------------------------------------------------|
| <b>Variable</b>                                                                                                                               | <b>ICD-9-CM Codes</b>                                           | <b>ICD-10-CM Codes</b>                                                                                                                                  |
| Acute MI                                                                                                                                      | 410, 412                                                        | I21, I22, I252                                                                                                                                          |
| Congestive Heart Failure                                                                                                                      | 428                                                             | I50                                                                                                                                                     |
| Peripheral Vascular Disease                                                                                                                   | 441, 4439, 7854, V434                                           | I71, I739, I790, R02, Z958, Z959                                                                                                                        |
| Cerebral Vascular Disease                                                                                                                     | 430–438                                                         | G46, G450, G451, G452, G454, G458, G459, I60, I61, I62, I63, I64, I65, I66, I670, I671, I672, I674, I675, I676, I677, I678, I679, I681, I682, I688, I69 |
| Dementia                                                                                                                                      | 290                                                             | F00, F01, F02, F051                                                                                                                                     |
| Pulmonary Disease                                                                                                                             | 490, 491, 492, 493, 494, 495, 496, 500, 501, 502, 503, 504, 505 | J40, J41, J42, J43, J44, J45, J46, J47, J60, J61, J62, J63, J64, J65, J66, J67                                                                          |
| Connective Tissue Disorder or Rheumatologic Disease                                                                                           | 7100, 7101, 7104, 7140, 7141, 7142, 71481(now 5171), 725        | M050, M051, M052, M053, M058, M059, M060, M063, M069, M32, M332, M34, M353                                                                              |
| Peptic Ulcer                                                                                                                                  | 531, 532, 533, 534                                              | K25, K26, K27, K28                                                                                                                                      |
| Liver Disease                                                                                                                                 | 5712, 5714, 5715, 5716                                          | K702, K703, K717, K73, K740, K742, K743, K744 K745, K746                                                                                                |
| Diabetes                                                                                                                                      | 2500, 2501, 2502, 2503, 2507                                    | E101, E105, E109, E111, E115, E119, E131, E135, E139, E141, E145, E149,                                                                                 |
| Diabetes with Complications                                                                                                                   | 2504, 2505, 2506                                                | E102, E103, E104, E112, E113, E114, E132, E133, E134, E142, E143, E144                                                                                  |
| Paraplegia                                                                                                                                    | 342, 3441                                                       | G041, G81, G820, G821, G822                                                                                                                             |

| <b>Supplementary Table S2. ICD-9-CM and ICD-10-CM diagnosis codes for controlled comorbidities included in the Charlson Comorbidity Index</b> |                                                                   |                                                                                                                                                                                                                             |
|-----------------------------------------------------------------------------------------------------------------------------------------------|-------------------------------------------------------------------|-----------------------------------------------------------------------------------------------------------------------------------------------------------------------------------------------------------------------------|
| <b>Variable</b>                                                                                                                               | <b>ICD-9-CM Codes</b>                                             | <b>ICD-10-CM Codes</b>                                                                                                                                                                                                      |
| Renal Disease                                                                                                                                 | 582, 5830, 5831, 5832, 5833, 5834 5835, 5836, 5837, 585, 586, 588 | N01, N03, N052, N053, N054, N055, N056, N072, N073, N074, N18, N19, N25                                                                                                                                                     |
| Cancer                                                                                                                                        | 140-172, 174-195, 200, 201, 202, 203, 204, 205, 206, 207, 208     | C0, C1, C2, C3, C40, C41, C43, C45, C46, C47, C48, C49, C5, C6, C70, C71, C72, C73, C74, C75, C76, C80, C81, C82, C83, C84, C85, C883, C887, C889, C900, C901, C91, C92, C93, C940, C941, C942, C943, C9451, C947, C95, C96 |
| Metastatic Cancer                                                                                                                             | 196, 197, 198, 1990, 1991                                         | C77, C78, C79, C80                                                                                                                                                                                                          |
| Severe Liver Disease                                                                                                                          | 5722, 5723, 5724, 5728                                            | K721, K729, K766, K767                                                                                                                                                                                                      |
| HIV/Aids                                                                                                                                      | 042, 043, 044                                                     | B20, B21, B22, B23, B24                                                                                                                                                                                                     |

| <b>Supplementary Table S3. ICD-9-CM and ICD-10-CM diagnosis codes for controlled comorbidities not included in the Charlson Comorbidity Index</b> |                                                       |                                                 |
|---------------------------------------------------------------------------------------------------------------------------------------------------|-------------------------------------------------------|-------------------------------------------------|
| <b>Variable</b>                                                                                                                                   | <b>ICD-9-CM Codes</b>                                 | <b>ICD-10-CM Codes</b>                          |
| Spinal cord injury                                                                                                                                | 952                                                   | S14, S24, S34                                   |
| Malnutrition                                                                                                                                      | 260, 261, 262, 263, 263.1, 263.2, 263.8, 263.9, 799.4 | E40, E41, E42, E43, E44.0, E44.1, E45, E46, R64 |
| Smoking                                                                                                                                           | 305.1, V15.82                                         | F17.200, Z87.891                                |
| Alcohol Use                                                                                                                                       | 305, 305.01, 305.02, 305.03, 303.9, 303.92, 303.93    | F10.10, F10.11, F10.20, F10.21                  |
